# Supplementary material for: A superhydrophilic and underwater superoleophobic chitosan–TiO2 composite membrane for fast oil-in-water emulsion separation
Source: Royal Society of Chemistry journal article supplement (doi:10.1039/c7ra08266e), 2017-01-01
Supplement: c7ra08266e1.pdf [file c7ra08266e1.pdf]

## Supporting Information

### **A Superhydrophilic and Underwater Superoleophobic Chitosan-TiO<sub>2</sub> Composite Membrane for Fast Oil-in-Water Emulsions Separation**

Yanqing Du,<sup>a</sup> Yujiang Li<sup>a,\*</sup> and Tao Wu<sup>b,\*</sup>

<sup>a</sup> *Shandong Provincial Key Laboratory of Water Pollution Control and Resource Reuse, School of Environmental Science and Engineering, Shandong University, Jinan, 250100, PR China. E-mail: [yujiang@sdu.edu.cn](mailto:yujiang@sdu.edu.cn)*

<sup>b</sup> *Key Laboratory of Colloid and Interface Science of Education Ministry, Shandong University, Jinan, 250100, PR China. E-mail: [wutao@sdu.edu.cn](mailto:wutao@sdu.edu.cn)*

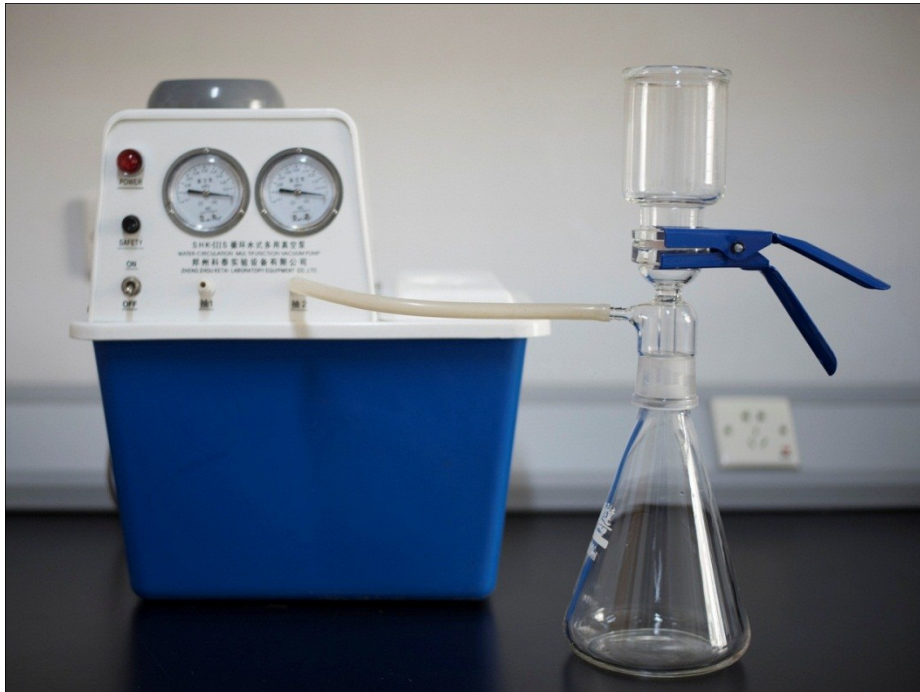

**Fig. S1** The vacuum-driven filtration device used in this work.

(a)

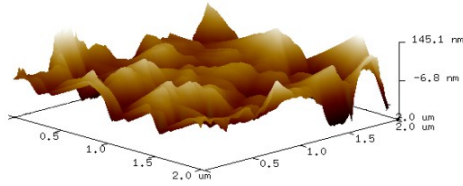

(b)

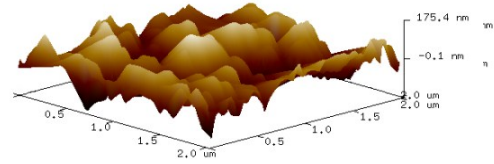

(c)

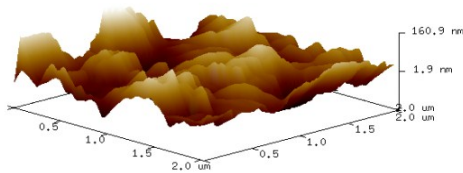

(d)

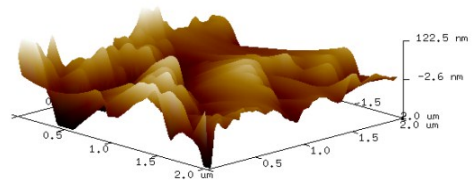

(e)

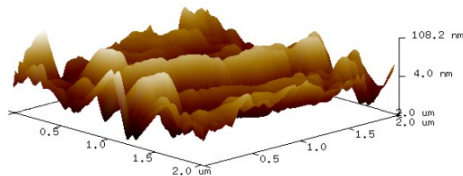

**Fig. S2** AFM images of different membranes: (a) pristine cellulose acetate membrane, (b) CS-modified membrane, (c) CST (3:1) membrane, (d) CST (3:4) membrane, and (e) CST (3:7) membrane.

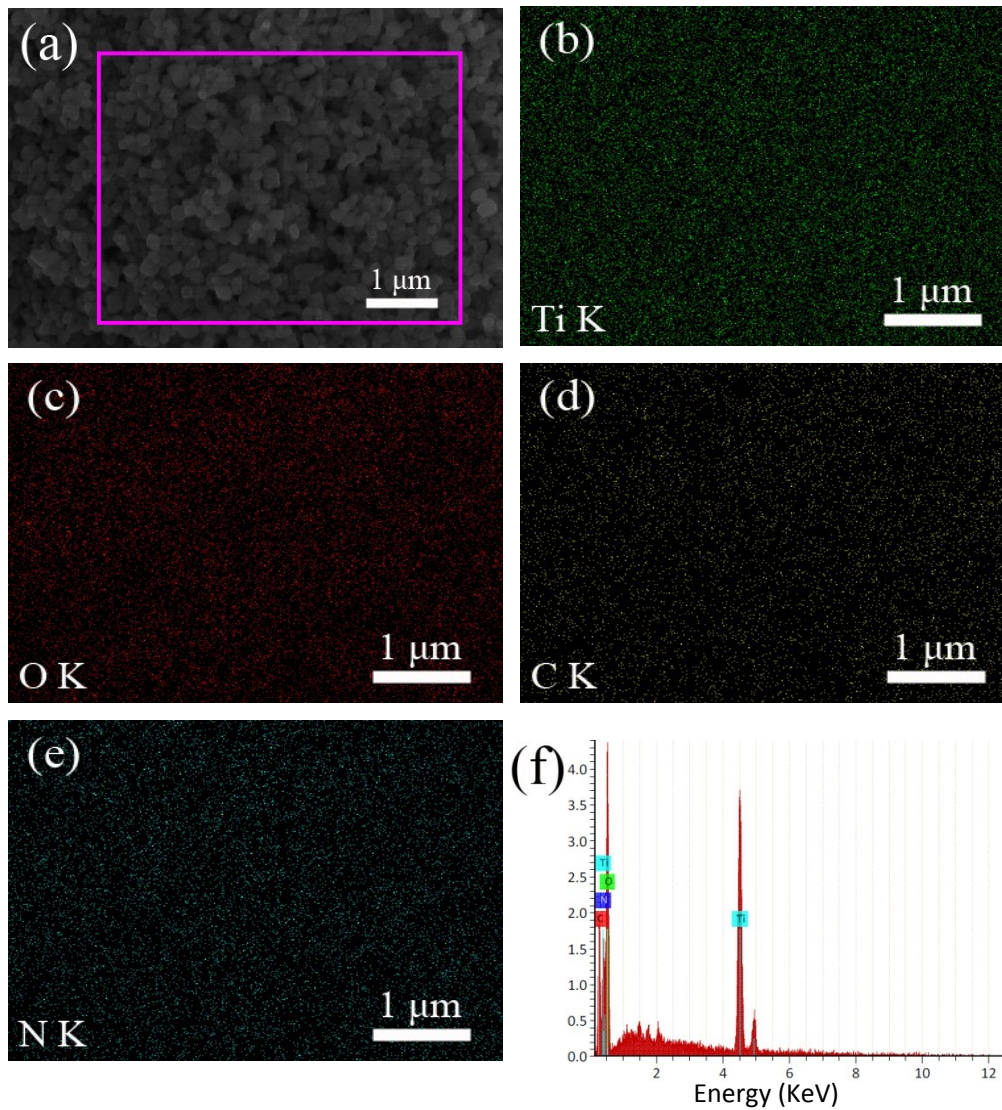

**Fig. S3** SEM image (a) and corresponding EDS mapping images of (b) Ti, (c) O, (d) C, (e) N, and (f) EDS spectrum of the CST (3:4) membrane

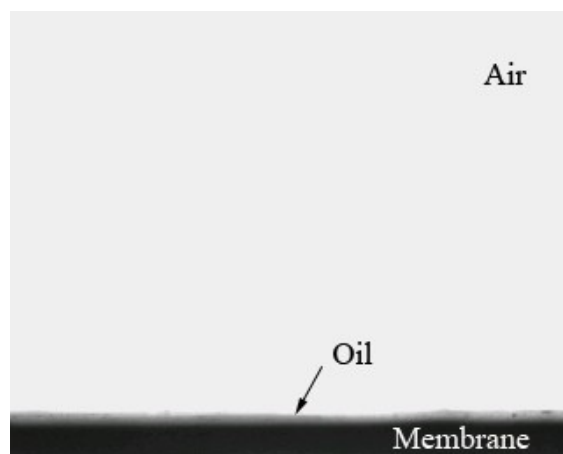

**Fig. S4** Photograph of an oil droplet (1,2-dichloroethane) in air on the CST (3:4) membrane surface.

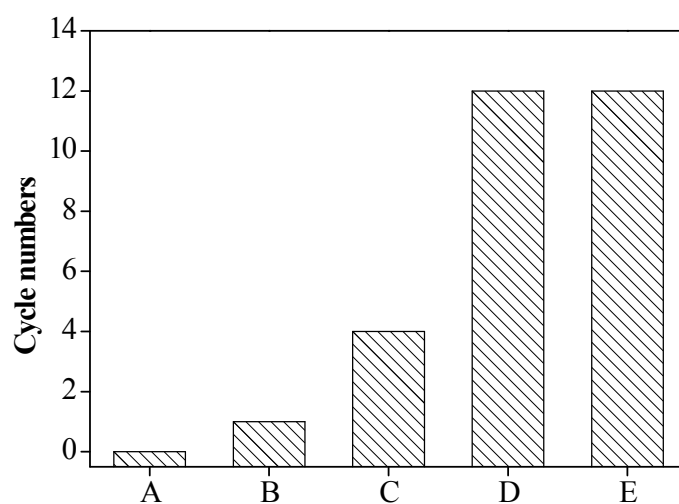

**Fig. S5** Oil/water separation cycle numbers of different modified membranes for hexadecane-in-water emulsion: A - pristine cellulose acetate membrane, B - CS modified membrane, C - CST (3:1) membrane, D - CST (3:4) membrane, and E - CST (3:7) membrane.

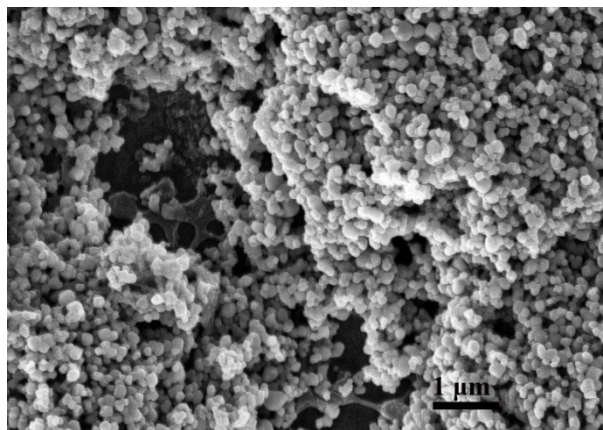

**Fig. S6** SEM images of the CST (3:4) membrane after 10 separation cycles for hexadecane-in-water emulsion.

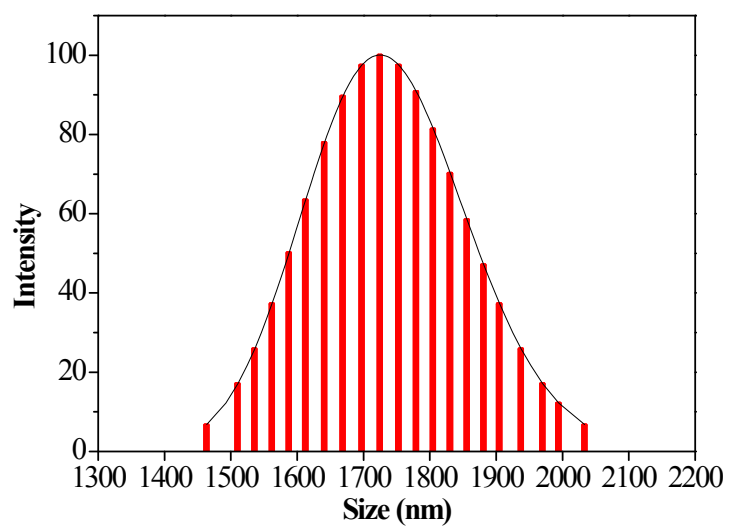

**Fig. S7** Oil droplet size distribution of the hexadecane-in-water emulsion stabilized by SDS was examined by DLS measurement.



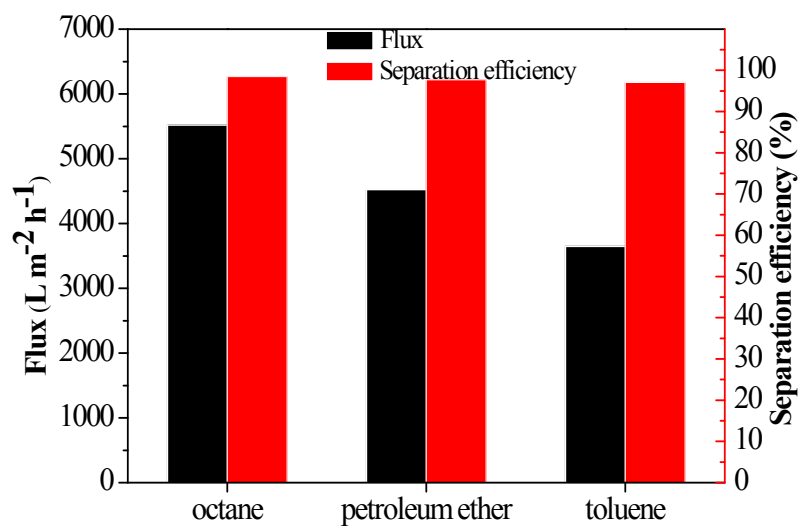

**Fig. S8** Flux and separation efficiencies of the CST (3:4) membrane for different oil-in-water emulsions.

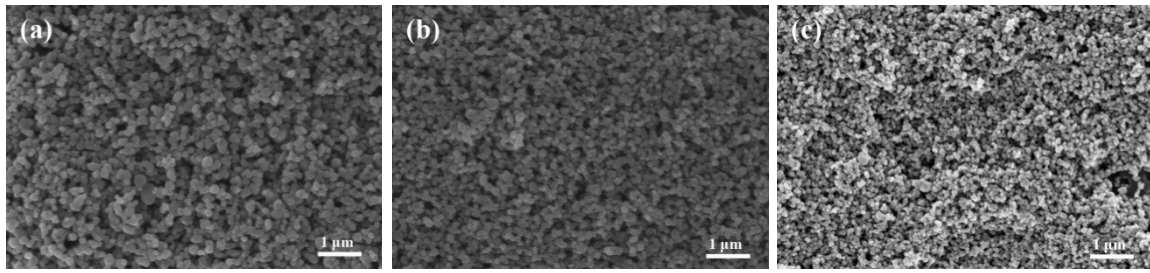

**Fig. S9** SEM images of the CST (3:4) membrane after immersing in different solutions (pH=1, pH=13 and 5% NaCl )

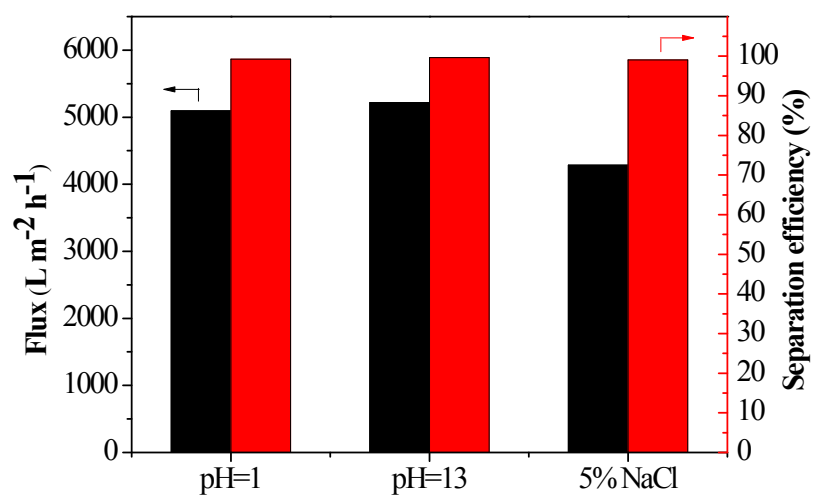

**Fig. S10** Flux and separation efficiencies of the CST (3:4) membrane for hexadecane-in-corrosive liquid emulsions with pH of 1, 13, and 5% NaCl.

**Table S1.** Element contents of different membranes by XPS

| Membranes                           | C (At. %) | N (At. %) | Ti (At. %) | O (At. %) |
|-------------------------------------|-----------|-----------|------------|-----------|
| pristine cellulose acetate membrane | 59.79     | 0         | 0          | 40.21     |
| CS modified membrane                | 60.9      | 1.18      | 0          | 37.92     |
| CST (3:1) membrane                  | 54.6      | 0.91      | 4.87       | 39.62     |
| CST (3:4) membrane                  | 37.85     | 1.16      | 14.45      | 46.54     |
| CST (3:7) membrane                  | 27.68     | 0.73      | 19.78      | 51.81     |

**Table S2.** Summary of different membranes for oil/water separation.

| Materials                                                                          | Emulsion                                   | Flux (L m <sup>-2</sup> h <sup>-1</sup> ) | Separation efficiency (%) | Ref       |
|------------------------------------------------------------------------------------|--------------------------------------------|-------------------------------------------|---------------------------|-----------|
| Propargyl-poly (ethylene glycols)(pro-PEG)                                         | Soybean oil/water emulsion                 | 120                                       | 99.7                      | 34        |
| Graphene, TiO <sub>2</sub>                                                         | Toluene-in-water emulsion                  | 84                                        | 99.92                     | 35        |
| Polysulfone (PSf), polyvinylpyrrolidone (PVP), polyethylene glycol (PEG)           | Crude oil-in-water emulsion                | 113                                       | 98.9                      | 36        |
| Grapheme oxide (GO)                                                                | Machine oil-in-water emulsion              | 667                                       | 98.7                      | 37        |
| Dopamine hydrochloride (DA),(3-aminopropyl)triethoxy-sain(KH550), TiO <sub>2</sub> | SDS/n-hexadecane/H <sub>2</sub> O emulsion | 605                                       | 99.34                     | 38        |
| Chitosan, TiO <sub>2</sub>                                                         | Hexadecane-in-water emulsion               | 6002.5                                    | 99.77                     | This work |
